# Supplementary material for: The relative income effect: an experiment
Source: Springer Nature journal article supplement (doi:10.1007/s10683-020-09648-w), 2020-03-10
Supplement: MOESM1 [file 10683_2020_9648_MOESM1_ESM.pdf]

## Introduction

### ***A STUDY OF DECISION MAKING - INFORMED CONSENT***

#### **RESEARCH PROCEDURES**

This research is being conducted to study decision making. The experiment will last for up to 30 minutes. In addition to the \$1 reward for completing this assignment, you will receive a bonus with a minimum value of \$2, a maximum value of \$10, and an average value of \$6, depending on a series of random choices made by the computer. You will receive your reward and bonus within 3 days of completing the study. If you do not complete the study, you will receive no payment—that is, you will not receive the reward and you will not receive a bonus. This study does not involve any deception. Deception is not permitted in economic experiments.

#### **RISKS**

There are no foreseeable risks for participating in this research.

#### **BENEFITS**

There are no direct personal benefits to you as a participant, other than the payment.

#### **CONFIDENTIALITY**

The data in this study will be confidential. You will not be asked to identify yourself. No person-identifiable information will be collected. While it is understood that no computer transmission can be perfectly secure, reasonable efforts will be made to protect the confidentiality of your transmission.

#### **PARTICIPATION**

You must be 18 or over to participate. Your participation is voluntary, and you may withdraw from the study at any time and for any reason. There are no costs to you or any other party.

#### **CONTACT**

This research is being conducted by Professor Homa Zarghamee at Barnard College of Columbia University. Professor Zarghamee may be reached at [hzargham@barnard.edu](mailto:hzargham@barnard.edu) for questions or complaints. You may also contact the Barnard College Institutional Review Board at [irb@barnard.edu](mailto:irb@barnard.edu) if you have questions or comments regarding your rights as a participant in the research.

This research has been reviewed according to Barnard College's procedures governing research participation.

By clicking here you agree to participate in the study.

By clicking here, you agree to participate in the study.

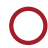

## INSTRUCTIONS

Thank you for participating in this study. You and everybody else in this study have been randomly assigned to groups of two people. The other member of your group (hereafter referred to as Participant X) could be anybody participating in this study. You and Participant X will never learn each other's identities.

During this session you will answer a questionnaire. Then you will be informed how many experimental points (**either 2 or 10 points**) will be allotted to each member of your group (that is, to you and Participant X). There are four possible outcomes, and one of them will be randomly chosen for your group:

- You receive 2 points, and Participant X receives 2 points.
- You receive 2 points, and Participant X receives 10 points.

- You receive 10 points, and Participant X receives 2 points.
- You receive 10 points, and Participant X receives 10 points.

Next, you will answer a second questionnaire and lastly a demographic survey. **Your bonus will be \$6 regardless of how many experimental points you receive. The same is true for Participant X.**

The questions will be presented one at a time on your computer monitor. To answer a question you must indicate your answer by clicking **BOTH** your choice **AND** the **OK** button. Please make sure to read each question closely as the available response-categories vary.

The first question is a practice question intended to familiarize you with the interface.

If you are ready, please click the **OK** button.

## INSTRUCTIONS

Thank you for participating in this study. You and everybody else in the session have been randomly assigned to groups of two people. The other member of your group (hereafter referred to as Participant X) could be anybody participating in this study. You and Participant X will never learn each other's identities.

During this session you will answer a questionnaire. Then you will be informed how many experimental points (**either 2 or 10 points**) will be allotted to each member of your group (that is, to you and Participant X). There are four possible outcomes, and one of them will be randomly chosen for your group:

- You receive 2 points, and Participant X receives 2 points.
- You receive 2 points, and Participant X receives 10 points.
- You receive 10 points, and Participant X receives 2 points.
- You receive 10 points, and Participant X receives 10 points.

Next, you will answer a second questionnaire and lastly a demographic survey.

**You and Participant X will receive a bonus payment of \$1 for each experimental point you receive.**

The questions will be presented one at a time on your computer monitor. To answer a question you must indicate your answer by clicking **BOTH** your choice **AND** the **OK** button. Please make sure to read each question closely as the available response-categories vary.

The first question is a practice question intended to familiarize you with the interface.

If you are ready, please click the **OK** button.

What year is it?

*Please enter your answer and click OK to proceed.*

- 1990
- 2017
- 2000
- 2018
- 2019

## Survey Part 1

Please indicate your agreement or disagreement with the following statement:

**For some reason I am not very comfortable.**

*Please enter your answer and click OK to proceed.*

- Strongly disagree
- Disagree
- Neither agree nor disagree
- Agree
- Strongly agree

Please indicate your agreement or disagreement with the following statement:

**At this moment I feel "edgy" or irritable.**

*Please enter your answer and click OK to proceed.*

- Strongly disagree
- Disagree
- Neither agree nor disagree
- Agree
- Strongly agree

Please indicate your agreement or disagreement with the following statement:

## Currently, I am in a good mood.

*Please enter your answer and click OK to proceed.*

- Strongly disagree
- Disagree
- Neither agree nor disagree
- Agree
- Strongly agree

Please indicate your agreement or disagreement with the following statement:

### **As I answer these questions, I feel very cheerful.**

*Please enter your answer and click OK to proceed.*

- Strongly disagree
- Disagree
- Neither agree nor disagree
- Agree
- Strongly agree

Please read the following item carefully, thinking about how it relates to your life, and then indicate how true it is for you. Use the following scale to respond.

### **I feel like I am free to decide for myself how to live my life.**

*Please enter your answer and click OK to proceed.*

- 1 Not true at all
- 2
- 3
- 4 Somewhat true
- 5
- 6
- 7 Very true

Please read the following item carefully, thinking about how it relates to your life, and then indicate how true it is for you. Use the following scale to respond.

**Often, I do not feel very competent.**

*Please enter your answer and click OK to proceed.*

- 1 Not true at all
- 2
- 3
- 4 Somewhat true
- 5
- 6
- 7 Very true

Please read the following item carefully, thinking about how it relates to your life, and then indicate how true it is for you. Use the following scale to respond.

**People I know tell me I am good at what I do.**

*Please enter your answer and click OK to proceed.*

- 1 Not true at all
- 2
- 3
- 4 Somewhat true
- 5
- 6
- 7 Very true

Please read the following item carefully, thinking about how it relates to your life, and then indicate how true it is for you. Use the following scale to respond.

**I pretty much keep to myself and don't have a lot of social contacts.**

*Please enter your answer and click OK to proceed.*

- 1 Not true at all
- 2
- 3
- 4 Somewhat true
- 5
- 6
- 7 Very true

Please read the following item carefully, thinking about how it relates to your life,



and then indicate how true it is for you. Use the following scale to respond.

**I consider the people I regularly interact with to be my friends.**

*Please enter your answer and click OK to proceed.*

- 1 Not true at all
- 2
- 3
- 4 Somewhat true
- 5
- 6
- 7 Very true

Please read the following item carefully, thinking about how it relates to your life, and then indicate how true it is for you. Use the following scale to respond.

**In my daily life, I frequently have to do what I am told.**

*Please enter your answer and click OK to proceed.*

- 1 Not true at all
- 2
- 3
- 4 Somewhat true
- 5
- 6
- 7 Very true

Please read the following item carefully, thinking about how it relates to your life, and then indicate how true it is for you. Use the following scale to respond.

**Most days I feel a sense of accomplishment from what I do.**

*Please enter your answer and click OK to proceed.*

- 1 Not true at all
- 2
- 3
- 4 Somewhat true
- 5
- 6
- 7 Very true

Please read the following item carefully, thinking about how it relates to your life, and then indicate how true it is for you. Use the following scale to respond.

**In my life I do not get much of a chance to show how capable I am.**

*Please enter your answer and click OK to proceed.*

- 1 Not true at all
- 2
- 3
- 4 Somewhat true
- 5

- 6
- 7 Very true

Please read the following item carefully, thinking about how it relates to your life, and then indicate how true it is for you. Use the following scale to respond.

**I feel like I can pretty much be myself in my daily situations.**

*Please enter your answer and click OK to proceed.*

- 1 Not true at all
- 2
- 3
- 4 Somewhat true
- 5
- 6
- 7 Very true

Please read the following item carefully, thinking about how it relates to your life, and then indicate how true it is for you. Use the following scale to respond.

**I often do not feel very capable.**

*Please enter your answer and click OK to proceed.*

- 1 Not true at all
- 2

- 3
- 4 Somewhat true
- 5
- 6
- 7 Very true

Please read the following item carefully, thinking about how it relates to your life, and then indicate how true it is for you. Use the following scale to respond.

**People are generally pretty friendly towards me.**

*Please enter your answer and click OK to proceed.*

- 1 Not true at all
- 2
- 3
- 4 Somewhat true
- 5
- 6
- 7 Very true

## **Screeners 1**

Please indicate either strong agreement or strong disagreement with the following statement:

**Currently, the year is 2025.**

*Please enter your answer and click OK to proceed.*

- Strongly disagree
- Disagree
- Neither agree nor disagree
- Agree
- Strongly agree

## Revelation

**Remember, the number of points you and Participant X receive will not affect your bonus payments.**

**Recall that the four possible outcomes are the following:**

- **You receive 2 points, and Participant X receives 2 points.**
- **You receive 2 points, and Participant X receives 10 points.**
- **You receive 10 points, and Participant X receives 2 points.**
- **You receive 10 points, and Participant X receives 10 points.**

**You were randomly assigned to one of these outcomes. To find out which one, please click the OK button.**

**Remember, you and Participant X will receive a bonus payment of a dollar for each point you receive.**

**Recall that the four possible outcomes are the following:**

- **You receive 2 points, and Participant X receives 2 points.**
- **You receive 2 points, and Participant X receives 10 points.**
- **You receive 10 points, and Participant X receives 2 points.**
- **You receive 10 points, and Participant X receives 10 points.**

**You were randomly assigned to one of these outcomes. To find out which one, please click the OK button.**

**Remember, the number of points you and Participant X receive will not affect your bonus payments.**

- **You receive 2 points, and Participant X receives 2 points.**

**Remember, the number of points you and Participant X receive will not affect your bonus payments.**

- **You receive 2 points, and Participant X receives 10 points.**

**Remember, the number of points you and Participant X receive will not affect your bonus payments.**

- **You receive 10 points, and Participant X receives 2 points.**

**Remember, the number of points you and Participant X receive will not affect your bonus payments.**

- **You receive 10 points, and Participant X receives 10 points.**

**Remember, you and Participant X will receive a bonus payment of a dollar for each point you receive.**

- **You receive 2 points, and Participant X receives 2 points.**



**Remember, you and Participant X will receive a bonus payment of a dollar for each point you receive.**

- **You receive 2 points, and Participant X receives 10 points.**

**Remember, you and Participant X will receive a bonus payment of a dollar for each point you receive.**

- **You receive 10 points, and Participant X receives 2 points.**

**Remember, you and Participant X will receive a bonus payment of a dollar for each point you receive.**

- **You receive 10 points, and Participant X receives 10 points.**

**MSF**

Please indicate your agreement or disagreement with the following statement:

**For some reason I am not very comfortable.**

*Please enter your answer and click OK to proceed.*

- Strongly disagree
- Disagree
- Neither agree nor disagree
- Agree
- Strongly agree

Please indicate your agreement or disagreement with the following statement:

**At this moment I feel "edgy" or irritable.**

*Please enter your answer and click OK to proceed.*

- Strongly disagree
- Disagree
- Neither agree nor disagree
- Agree
- Strongly agree

Please indicate your agreement or disagreement with the following statement:

**Currently, I am in a good mood.**

*Please enter your answer and click OK to proceed.*

- Strongly disagree
- Disagree
- Neither agree nor disagree
- Agree
- Strongly agree

Please indicate your agreement or disagreement with the following statement:

**As I answer these questions, I feel very cheerful.**

*Please enter your answer and click OK to proceed.*

- Strongly disagree
- Disagree
- Neither agree nor disagree
- Agree
- Strongly agree

## Screeners 2

Please indicate the value of the bonus you will receive (in addition to the \$1 reward you will receive for completing this study).

- \$2.00
- \$6.00
- \$10.00

Please indicate the value of the bonus Participant X will receive (in addition to the \$1 reward Participant X will receive for completing this study).

- \$2.00

- \$6.00
- \$10.00

## Survey Part 2

Please read the following item carefully, thinking about how it relates to your life, and then indicate how true it is for you. Use the following scale to respond.

**I really like the people I interact with.**

*Please enter your answer and click OK to proceed.*

- 1 Not true at all
- 2
- 3
- 4 Somewhat true
- 5
- 6
- 7 Very true

Please read the following item carefully, thinking about how it relates to your life, and then indicate how true it is for you. Use the following scale to respond.

**I feel pressured in my life.**

*Please enter your answer and click OK to proceed.*

- 1 Not true at all
- 2
- 3
- 4 Somewhat true
- 5
- 6
- 7 Very true

Please read the following item carefully, thinking about how it relates to your life, and then indicate how true it is for you. Use the following scale to respond.

**I get along with people I come into contact with.**

*Please enter your answer and click OK to proceed.*

- 1 Not true at all
- 2
- 3
- 4 Somewhat true
- 5
- 6
- 7 Very true

Please read the following item carefully, thinking about how it relates to your life, and then indicate how true it is for you. Use the following scale to respond.

**I generally feel free to express my ideas and opinions.**

*Please enter your answer and click OK to proceed.*

- 1 Not true at all
- 2
- 3
- 4 Somewhat true
- 5
- 6
- 7 Very true

Please read the following item carefully, thinking about how it relates to your life, and then indicate how true it is for you. Use the following scale to respond.

**I have been able to learn interesting new skills recently.**

*Please enter your answer and click OK to proceed.*

- 1 Not true at all
- 2
- 3
- 4 Somewhat true
- 5
- 6
- 7 Very true

Please read the following item carefully, thinking about how it relates to your life,

and then indicate how true it is for you. Use the following scale to respond.

**People in my life care about me.**

*Please enter your answer and click OK to proceed.*

- 1 Not true at all
- 2
- 3
- 4 Somewhat true
- 5
- 6
- 7 Very true

Please read the following item carefully, thinking about how it relates to your life, and then indicate how true it is for you. Use the following scale to respond.

**People I interact with on a daily basis tend to take my feelings into consideration.**

*Please enter your answer and click OK to proceed.*

- 1 Not true at all
- 2
- 3
- 4 Somewhat true
- 5
- 6
- 7 Very true



Please read the following item carefully, thinking about how it relates to your life, and then indicate how true it is for you. Use the following scale to respond.

**There are not many people that I am close to.**

*Please enter your answer and click OK to proceed.*

- 1 Not true at all
- 2
- 3
- 4 Somewhat true
- 5
- 6
- 7 Very true

Please read the following item carefully, thinking about how it relates to your life, and then indicate how true it is for you. Use the following scale to respond.

**The people I interact with regularly do not seem to like me much.**

*Please enter your answer and click OK to proceed.*

- 1 Not true at all
- 2
- 3
- 4 Somewhat true
- 5
- 6

7 Very true

Please read the following item carefully, thinking about how it relates to your life, and then indicate how true it is for you. Use the following scale to respond.

**There is not much opportunity for me to decide for myself how to do things in my daily life.**

*Please enter your answer and click OK to proceed.*

- 1 Not true at all
- 2
- 3
- 4 Somewhat true
- 5
- 6
- 7 Very true

## Questionnaire 1

What is your gender?

- Female
- Male
- Other, please specify
- Prefer not to answer

What is your age (in years)?

*Please enter 0 if you prefer not to answer.*

Are you a citizen or permanent resident of the United States?

- Yes
- No
- Prefer not to answer

Rate your English:

- Native
- Fluent
- Proficient
- Less than proficient
- Prefer not to answer

What race/ethnicity do you identify yourself as:

- White (having origins in any of the original peoples of Europe, the Middle East, or North Africa)
- Black or African (having origins in any of the Black racial groups of Africa)
- Hispanic (having origins in Mexico, Central or South America)

- American Indian and Alaska Native (having origins in any of the original peoples of North, Central, or South America and maintaining tribal affiliation or community attachment)
- Asian (having origins in any of the original people of the Far East, Southeast Asia, or the Indian subcontinent including, for example, Cambodia, China, India, Japan, Korea, Malaysia, Pakistan, the Philippine Islands, Thailand, and Vietnam)
- Native Hawaiian and Other Pacific Islander (having origins in any of the original peoples of Hawaii, Guam, Samoa, or other Pacific Islands)
- Some other race, please specify
- Prefer not to answer

What religion do you consider yourself?

- Atheist / Agnostic
- Buddhist
- Christian (including Catholic, Protestant, and all other Christian denominations)
- Hindu
- Jewish
- Muslim
- Other
- Prefer not to answer

If you identified a religion in the previous question, are you practicing that religion?

- Practicing
- Not practicing
- Prefer not to answer

How often do you attend religious services?

- Never
- Less than once a year
- Once a year
- Several times a year
- Once a month
- Two to three times a month
- Nearly every week
- Every week
- More than once a week
- Prefer not to answer

How would you characterize your political views?

- Conservative
- Moderate
- Liberal / Progressive
- Prefer not to answer

## Questionnaire 2

What is the total (gross) income last year of your household? Please choose a single response:

- \$0 to less than \$25,000
- \$25,000 to less than \$50,000

- \$50,000 to less than \$75,000
- \$75,000 to less than \$100,000
- \$100,000 to less than \$125,000
- \$125,000 to less than \$150,000
- \$150,000 or more
- Prefer not to answer

Distribute 100 points among the five goals listed below to indicate their relative importance to you:

Financial success

A satisfying family life

Helping others

Global welfare

Doing work you enjoy

Total

What is your highest level of education?

- No high school
- Some high school
- Completed high school
- Some college
- Completed college
- Some grad/professional school
- Completed grad/professional school
- Prefer not to answer

Please indicate your employment status:

- Employed, full-time
- Employed, part-time
- Not employed, looking for work
- Not employed, not looking for work
- Student
- Retired
- Prefer not to answer

Some people feel they have completely free choice and control over their lives, while other people feel that what they do has no real effect on what happens to them. Please use the scale below to indicate how much freedom of choice and control you feel you have over the way your life turns out:

- 1. None at all
- 2
- 3
- 4
- 5
- 6
- 7
- 8
- 9
- 10. A great deal
- Prefer not to answer

In the space provided below, please try to describe what you believe to be the purpose of the study:

Powered by Qualtrics
